# Supplementary material for: Influence of COMT (rs4680) and DRD2 (rs1076560, rs1800497) Gene Polymorphisms on Safety and Efficacy of Methylphenidate Treatment in Children with Fetal Alcohol Spectrum Disorders
Source: MDPI journal article supplement (doi:10.3390/ijerph19084479), 2022-04-08
Supplement: s1 [file s1]

**Influence of COMT (rs4680) and DRD2 (rs1076560, rs1800497) genes polymorphisms on safety and efficacy of methylphenidate treatment in children with fetal alcohol spectrum disorders**

Małgorzata Śmiarowska, Bogusław Brzuchalski, Elżbieta Grzywacz, Damian Malinowski, Anna Machoy-Mokrzyńska, Anna Pierzchlińska, Monika Białecka

**A structured diagnostic interview questionnaire for attention deficit hyperactivity disorder (ADHD) according to ICD-10 and DSM-IV TR**

|                      |  |                   |  |
|----------------------|--|-------------------|--|
| Name of the child:   |  |                   |  |
| Date of examination: |  | Assessed period*: |  |
| Medications:         |  |                   |  |

\*FOR THE FIRST EXAMINATION, ASSESS THE 6-MONTH PERIOD REQUIRED FOR DIAGNOSIS, FOR SUBSEQUENT EXAMINATIONS AS NEEDED - "2 MONTHS FROM LAST VISIT", "1 MONTH FROM INTRODUCTION OF MEDICATION". MINIMUM PERIOD ASSESSED IS 2 WEEKS.

**ATTENTION DEFICIT DISORDER**

- The child is often unable to maintain sustained and close attention to detail or makes mistakes resulted from inattention at school, work, or other activity.  
**yes (3) rather yes (2) probably no (1) no (0)**
- The child often fails to maintain sustained attention on tasks/games.  
**yes (3) rather yes (2) probably not (1) no (0)**
- The child often does not seem to hear what is being said to it.  
**yes (3) rather yes (2) probably not (1) no (0)**
- The child is often unable to follow consecutive instructions or finish schoolwork, assigned work, or duties at work (but not because of oppositional behavior or misunderstanding of instructions).  
**yes (3) rather yes (2) probably not (1) no (0)**
- The child often has difficulty organizing its work or other activities.  
**yes (3) rather yes (2) probably not (1) no (0)**
- The child does not like, procrastinates or avoids activities that require prolonged mental effort, such as schoolwork or doing homework.  
**yes (3) rather yes (2) probably not (1) no (0)**
- The child often loses things needed for work or other activities, e.g., toys, school supplies, pencils, books, tools.  
**yes (3) rather yes (2) probably not (1) no (0)**
- The child is easily distracted by external stimuli.  
**yes (3) rather yes (2) probably no (1) no (0)**
- The child is often forgetful during daily activities.  
**yes (3) rather yes (2) probably not (1) no (0)**

|                    |  |                          |  |
|--------------------|--|--------------------------|--|
| Number of symptoms |  | Number of symptom scores |  |
|--------------------|--|--------------------------|--|

**HYPERACTIVITY**

- The child frequently has nervous movements of arms or legs or is unable to sit still, often wiggles arms or legs or fidgets in a chair.  
**yes (3) rather yes (2) probably no (1) no (0)**
- The child stands up from its seat during class or in other situations that require sitting still.  
**yes (3) rather yes (2) probably not (1) no (0)**
- The child frequently runs around or climbs on furniture in situations where it is disapproved (in adolescents or adults, there may be present only a feeling of distress).  
**yes (3) rather yes (2) probably not (1) no (0)**
- The child is often excessively noisy during play and has difficulty playing quietly.  
**yes (3) rather yes (2) probably not (1) no (0)**
- The child is often on the move; it "runs around like a light". The child's behavior is characterized by excessive motor activity  
**yes (3) rather yes (2) probably not (1) no (0)**

|                    |  |                          |  |
|--------------------|--|--------------------------|--|
| Number of symptoms |  | Number of symptom scores |  |
|--------------------|--|--------------------------|--|

**IMPULSIVITY**

- The child often rushes out with an answer before the question is fully asked.  
**yes (3) rather yes (2) probably no (1) no (0)**
- The child often fails to stand in line or wait for its turn in a game or group situation.  
**yes (3) rather yes (2) probably not (1) no (0)**
- The child frequently interrupts or disrupts others (e.g., interferes with others' conversation or play).  
**yes (3) rather yes (2) probably not (1) no (0)**
- The child is often excessively talkative.  
**yes (3) rather yes (2) probably no (1) no (0)**

|                    |  |                          |  |
|--------------------|--|--------------------------|--|
| Number of symptoms |  | Number of symptom scores |  |
|--------------------|--|--------------------------|--|

B. Some of the child's impairing symptoms of attention deficit disorder or attention deficit hyperactivity disorder (hyperactivity, impulsivity) appeared before the child was 7 years old.

**yes (3) rather yes (2) probably no (1) no (0)**

C. The child's functional impairment caused by these symptoms occurs in two or more situations (e.g., at school and at home).

**yes (3) rather yes (2) probably no (1) no (0)**

D. A clinically significant impairment in social, occupational, or school (educational) functioning is present.

**yes (3) rather yes (2) probably no (1) no (0)**

E. The child's symptoms do not occur in the course of persistent developmental disorder, schizophrenia, or other psychoses and cannot be more accurately recognized as symptoms of another mental disorder (e.g., mood, anxiety, dissociative, or abnormal personality disorders).

**yes (3) rather yes (2) probably no (1) no (0)**

|                                        |  |
|----------------------------------------|--|
| <b>Diagnosis by ICD-10:</b>            |  |
| <b>Diagnosis according to DSM- IV:</b> |  |



E. Patient fulfilled at least one requirement before reaching 10 years old?  
yes = beginning early childhood type    no = beginning at start of puberty type

|                     |     |                     |    |
|---------------------|-----|---------------------|----|
| Failure to diagnose | ODD | CD (clinical + ODD) | CD |
|---------------------|-----|---------------------|----|
