# Supplementary material for: Influence of COMT (rs4680) and DRD2 (rs1076560, rs1800497) Gene Polymorphisms on Safety and Efficacy of Methylphenidate Treatment in Children with Fetal Alcohol Spectrum Disorders
Source: MDPI journal article supplement (doi:10.3390/ijerph19084479), 2022-04-08
Supplement: s1 [file s1]

**Table S1. Genotype distribution of the studied *COMT*, and *DRD2* SNPs.**

| <i>COMT</i><br>rs4680 | N   | %      | <i>DRD2</i><br>rs1076560 | n   | %      | <i>DRD2</i><br>rs1800497 | N   | %      |
|-----------------------|-----|--------|--------------------------|-----|--------|--------------------------|-----|--------|
| <b>Genotype</b>       |     |        | <b>genotype</b>          |     |        | <b>genotype</b>          |     |        |
| GG                    | 77  | 25,41% | CC                       | 206 | 68,21% | GG                       | 198 | 65,35% |
| GA                    | 164 | 54,13% | CA                       | 86  | 28,48% | GA                       | 93  | 30,69% |
| AA                    | 62  | 20,46% | AA                       | 10  | 3,31%  | AA                       | 12  | 3,96%  |
| <b>Allele</b>         |     |        | <b>allele</b>            |     |        | <b>allele</b>            |     |        |
| G                     | 318 | 52,48% | C                        | 498 | 82,45% | G                        | 489 | 80,69% |
| A                     | 288 | 47,52% | A                        | 106 | 17,55% | A                        | 117 | 19,31% |

*COMT* rs4680 n=303; HWE p=0,14; MAF 0.4752; *DRD2* rs1076560 n=302; HWE p=0,78; MAF 0.1755;  
*DRD2* rs1800497 n=303; HWE p=0,80; MAF 0.1931

**Table S2. Linkage disequilibria between the studied loci in *DRD2* gene.**

| <b>DRD2</b>   | <b>rs1076560:C&gt;A</b>           | <b>rs1800497:G&gt;A</b> |
|---------------|-----------------------------------|-------------------------|
| rs1076560:C>A | $r^2 \downarrow$ $D' \rightarrow$ | 0.952                   |
| rs1800497:G>A | 0.590                             |                         |

distance (kbp) – 12.86

**Table S3. Comparison of estimated haplotype frequencies of *DRD2* gene between FASD and NFC groups.**

| <b>haplotype</b> | <b>FASD</b> | <b>NFC</b> | <b>p*</b> |
|------------------|-------------|------------|-----------|
| GC               | 0.784       | 0.829      | 0.14      |
| AA               | 0.183       | 0.154      | 0.28      |
| AC               | 0.028       | 0.013      | 0.21      |

\*Fisher Exact Test
